# Supplementary material for: Seasonal Diet Composition of Goitered Gazelle (Gazella subgutturosa) in an Arid and Semi-Arid Region of Western China
Source: MDPI journal article supplement (doi:10.3390/ani14050663), 2024-02-20
Supplement: s1 [file s1]

**Table S1.** Food composition of the goitered gazelle during four seasons.

| Plant species and family           | RD (%) |        |        |        |
|------------------------------------|--------|--------|--------|--------|
|                                    | Spring | Summer | Autumn | Winter |
| <b>Plumbaginaceae</b>              | 2.51   | 3.85   | 3.34   | 0      |
| <i>Limonium</i>                    | 2.51   | 3.85   | 3.34   | 0      |
| <i>Limonium bicolor</i>            | 2.51   | 3.85   | 3.34   | 0      |
| <b>Liliaceae</b>                   | 3.34   | 3.37   | 0      | 0      |
| <i>Asparagus</i>                   | 3.34   | 3.37   | 0      | 0      |
| <i>Asparagus brachyphyllus</i>     | 3.34   | 3.37   | 0      | 0      |
| <b>Lamiaceae</b>                   | 5.36   | 3.27   | 4.91   | 6.60   |
| <i>Thymus</i>                      | 2.21   | 1.10   | 2.51   | 5.13   |
| <i>Thymus mongolicus</i>           | 2.21   | 1.10   | 2.51   | 5.13   |
| <i>Dracocephalum</i>               | 2.01   | 0.96   | 1.88   | 1.47   |
| <i>Dracocephalum heterophyllum</i> | 2.01   | 0.96   | 1.88   | 1.47   |
| <i>Scutellaria</i>                 | 1.13   | 1.20   | 0.52   | 0      |
| <i>Scutellaria baicalensis</i>     | 1.13   | 1.20   | 0.52   | 0      |
| <b>Fabaceae</b>                    | 19.79  | 4.16   | 14.31  | 7.88   |
| <i>Astragalus</i>                  | 1.46   | 0.79   | 1.67   | 0.41   |
| <i>Astragalus melilotoides</i>     | 1.46   | 0.79   | 1.67   | 0.41   |
| <i>Lespedeza</i>                   | 2.06   | 0.55   | 2.09   | 5.24   |
| <i>Lespedeza davurica</i>          | 2.06   | 0.55   | 2.09   | 5.24   |
| <i>Hedysarum</i>                   | 1.96   | 0      | 1.67   | 0.71   |
| <i>Hedysarum brachypterum</i>      | 1.96   | 0      | 1.67   | 0.71   |
| <i>Caragana</i>                    | 9.08   | 0.41   | 5.95   | 0      |
| <i>Caragana roborovskii</i>        | 1.51   | 0.41   | 1.46   | 0      |
| <i>Caragana opulens</i>            | 3.65   | 0      | 3.34   | 0      |
| <i>Caragana sinica</i>             | 1.96   | 0      | 0      | 0      |
| <i>Caragana korshinskii</i>        | 1.96   | 0      | 1.15   | 0      |
| <i>Oxytropis</i>                   | 3.69   | 2.41   | 1.67   | 0.27   |
| <i>Oxytropis squammulosa</i>       | 1.48   | 1.65   | 1.15   | 0.27   |
| <i>Oxytropis aciphylla</i>         | 2.21   | 0.76   | 0.52   | 0      |
| <i>Senna</i>                       | 1.53   | 0      | 1.25   | 1.25   |
| <i>Senna tora</i>                  | 1.53   | 0      | 1.25   | 1.25   |
| <b>Gramineae</b>                   | 1.63   | 8.60   | 12.72  | 14.81  |
| <i>Stipa</i>                       | 0.88   | 3.69   | 4.52   | 7.58   |
| <i>Stipa grandis</i>               | 0.88   | 2.93   | 3.34   | 2.45   |
| <i>Stipa bungeana</i>              | 0      | 0.76   | 1.18   | 5.13   |
| <i>Neotrinia</i>                   | 0.75   | 1.03   | 4.39   | 3.00   |
| <i>Neotrinia splendens</i>         | 0.75   | 1.03   | 4.39   | 3.00   |
| <i>Pennisetum</i>                  | 0      | 0.83   | 0.52   | 0.82   |

| Plant species and family             | RD (%) |        |        |        |
|--------------------------------------|--------|--------|--------|--------|
|                                      | Spring | Summer | Autumn | Winter |
| <i>Pennisetum flaccidum</i>          | 0      | 0.83   | 0.52   | 0.82   |
| <b><i>Agropyron</i></b>              | 0      | 1.38   | 1.78   | 1.83   |
| <i>Agropyron cristatum</i>           | 0      | 0.55   | 1.78   | 1.31   |
| <i>Agropyron mongolicum</i>          | 0      | 0.83   | 0      | 0.52   |
| <b><i>Eleusine</i></b>               | 0      | 1.69   | 1.51   | 1.58   |
| <i>Eleusine indica</i>               | 0      | 1.69   | 1.51   | 1.58   |
| <b>Zygophyllaceae</b>                | 4.80   | 10.67  | 3.76   | 1.58   |
| <b><i>Peganum</i></b>                | 3.34   | 3.44   | 0.84   | 1.58   |
| <i>Peganum multisectum</i>           | 1.81   | 2.06   | 0      | 1.31   |
| <i>Peganum harmala</i>               | 1.53   | 1.38   | 0.84   | 0.27   |
| <b><i>Zygophyllum</i></b>            | 1.46   | 7.23   | 2.93   | 0      |
| <i>Zygophyllum xanthoxylum</i>       | 1.46   | 7.23   | 2.93   | 0      |
| <b>Compositae</b>                    | 15.69  | 11.15  | 6.90   | 6.46   |
| <b><i>Aster</i></b>                  | 5.73   | 3.79   | 2.09   | 2.18   |
| <i>Aster altaicus</i>                | 5.73   | 3.79   | 2.09   | 2.18   |
| <b><i>Artemisia</i></b>              | 8.55   | 6.06   | 4.81   | 4.28   |
| <i>Artemisia stechmanniana</i>       | 2.39   | 1.65   | 0.94   | 1.23   |
| <i>Artemisia frigida</i>             | 2.24   | 1.72   | 0.84   | 1.36   |
| <i>Artemisia scoparia</i>            | 1.66   | 1.14   | 0.73   | 0.82   |
| <i>Artemisia capillaris</i>          | 2.26   | 1.55   | 2.30   | 0.87   |
| <b><i>Sonchus</i></b>                | 1.03   | 0      | 0      | 0      |
| <i>Sonchus oleraceus</i>             | 1.03   | 0      | 0      | 0      |
| <b><i>Taraxacum</i></b>              | 0.38   | 1.31   | 0      | 0      |
| <i>Taraxacum mongolicum</i>          | 0.38   | 1.31   | 0      | 0      |
| <b>Chenopodiaceae</b>                | 23.85  | 21.49  | 5.33   | 30.07  |
| <b><i>Kali</i></b>                   | 9.26   | 5.99   | 0.42   | 11.51  |
| <i>Kali collinum</i>                 | 9.26   | 5.99   | 0.42   | 11.51  |
| <b><i>Krascheninnikovia</i></b>      | 14.59  | 15.50  | 4.91   | 18.56  |
| <i>Krascheninnikovia arborescens</i> | 14.59  | 15.50  | 4.91   | 18.56  |
| <b>Polygonaceae</b>                  | 1.06   | 0.69   | 0.84   | 0      |
| <b><i>Rheum</i></b>                  | 1.06   | 0.69   | 0.84   | 0      |
| <i>Rheum racemiferum</i>             | 1.06   | 0.69   | 0.84   | 0      |
| <b>Gentianaceae</b>                  | 3.72   | 0      | 0.63   | 0      |
| <b><i>Gentiana</i></b>               | 3.72   | 0      | 0.63   | 0      |
| <i>Gentiana macrophylla</i>          | 1.51   | 0      | 0      | 0      |
| <i>Gentiana dahurica</i>             | 2.21   | 0      | 0.63   | 0      |
| <b>Apocynaceae</b>                   | 0.70   | 1.03   | 0.84   | 0      |
| <b><i>Vincetoxicum</i></b>           | 0.70   | 1.03   | 0.84   | 0      |

| Plant species and family            | RD (%) |        |        |        |
|-------------------------------------|--------|--------|--------|--------|
|                                     | Spring | Summer | Autumn | Winter |
| <i>Vincetoxicum mongolicum</i>      | 0.70   | 1.03   | 0.84   | 0      |
| <b>Verbenaceae</b>                  | 1.76   | 3.37   | 1.78   | 10.04  |
| <i>Caryopteris</i>                  | 1.76   | 3.37   | 1.78   | 10.04  |
| <i>Caryopteris mongholica</i>       | 1.76   | 3.37   | 1.78   | 10.04  |
| <b>Rosaceae</b>                     | 5.71   | 20.83  | 32.74  | 18.77  |
| <i>Potentilla</i>                   | 3.70   | 4.30   | 3.86   | 1.04   |
| <i>Potentilla bifurca</i>           | 1.61   | 1.55   | 1.67   | 1.04   |
| <i>Potentilla acaulis</i>           | 1.21   | 2.75   | 1.46   | 0      |
| <i>Potentilla sischanensis</i>      | 0.88   | 0      | 0.73   | 0      |
| <b>Prunus</b>                       | 2.01   | 16.53  | 28.87  | 17.74  |
| <i>Prunus sibirica</i>              | 2.01   | 16.53  | 28.87  | 17.74  |
| <b>Brassicaceae</b>                 | 1.56   | 0      | 0      | 0      |
| <i>Lepidium</i>                     | 0.70   | 0      | 0      | 0      |
| <i>Lepidium latifolium</i>          | 0.70   | 0      | 0      | 0      |
| <b>Braya</b>                        | 0.85   | 0      | 0      | 0      |
| <i>Braya humilis</i>                | 0.85   | 0      | 0      | 0      |
| <b>Scrophulariaceae</b>             | 0.70   | 0      | 0.42   | 0      |
| <i>Rehmannia</i>                    | 0.70   | 0      | 0.42   | 0      |
| <i>Rehmannia glutinosa</i>          | 0.70   | 0      | 0.42   | 0      |
| <b>Convolvulaceae</b>               | 0.75   | 0.89   | 0.42   | 0      |
| <i>Convolvulus</i>                  | 0.75   | 0.89   | 0.42   | 0      |
| <i>Convolvulus tragacanthoides</i>  | 0.75   | 0.89   | 0.42   | 0      |
| <b>Linaceae</b>                     | 0.40   | 0      | 0      | 0      |
| <i>Linum</i>                        | 0.40   | 0      | 0      | 0      |
| <i>Linum perenne</i>                | 0.40   | 0      | 0      | 0      |
| <b>Salicaceae</b>                   | 1.26   | 2.48   | 5.64   | 0      |
| <i>Salix</i>                        | 1.26   | 2.48   | 5.64   | 0      |
| <i>Salix matsudana</i>              | 1.26   | 2.48   | 5.64   | 0      |
| <b>Ulmaceae</b>                     | 1.13   | 1.03   | 2.19   | 2.18   |
| <i>Ulmus</i>                        | 1.13   | 1.03   | 2.19   | 2.18   |
| <i>Ulmus glaucescens</i>            | 1.13   | 1.03   | 2.19   | 2.18   |
| <b>Iridaceae</b>                    | 1.21   | 1.38   | 0      | 0      |
| <i>Iris</i>                         | 1.21   | 1.38   | 0      | 0      |
| <i>Iris lactea</i>                  | 1.21   | 1.38   | 0      | 0      |
| <b>Rutaceae</b>                     | 2.26   | 0      | 0.73   | 0      |
| <i>Haplophyllum</i>                 | 2.26   | 0      | 0.73   | 0      |
| <i>Haplophyllum tragacanthoides</i> | 1.36   | 0      | 0.73   | 0      |
| <i>Haplophyllum dauricum</i>        | 0.91   | 0      | 0      | 0      |

| Plant species and family   | <i>RD</i> (%) |        |        |        |
|----------------------------|---------------|--------|--------|--------|
|                            | Spring        | Summer | Autumn | Winter |
| <b>Ephedraceae</b>         | 0.80          | 1.72   | 2.51   | 1.61   |
| <b><i>Ephedra</i></b>      | 0.80          | 1.72   | 2.51   | 1.61   |
| <i>Ephedra przewalskii</i> | 0.80          | 1.72   | 2.51   | 1.61   |
